# Supplementary material for: The Effect of Doping on the Digital Etching of Silicon-Selective Silicon–Germanium Using Nitric Acids
Source: MDPI journal article supplement (doi:10.3390/nano11051209), 2021-05-03
Supplement: s1 [file s1]

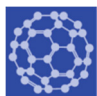

# The Effect of Doping on the Digital Etching of Silicon-Selective Silicon–Germanium Using Nitric Acids

Yangyang Li <sup>1,2</sup>, Huilong Zhu <sup>1,\*</sup>, Zhenzhen Kong <sup>1</sup>, Yongkui Zhang <sup>1</sup>, Xuezheng Ai <sup>1</sup>, Guilei Wang <sup>1,2,3</sup>, Qi Wang <sup>1</sup>, Ziyi Liu <sup>1,2</sup>, Shunshun Lu <sup>1</sup>, Lu Xie <sup>1,2</sup>, Weixing Huang <sup>1,2</sup>, Yongbo Liu <sup>1,2</sup>, Chen Li <sup>1,2</sup>, Junjie Li <sup>1</sup>, Hongxiao Lin <sup>1,3</sup>, Jiale Su <sup>1</sup>, Chuanbin Zeng <sup>4</sup> and Henry H. Radamson <sup>1,2,3,\*</sup>

- <sup>1</sup> Key Laboratory of Microelectronics Devices & Integrated Technology, Institute of Microelectronics, Chinese Academy of Sciences, Beijing 100029, China; liyangyang@ime.ac.cn (Y.L.); kongzhenzhen@ime.ac.cn (Z.K.); zhangyongkui@ime.ac.cn (Y.Z.); aixuezheng@ime.ac.cn (X.A.); wangguilei@ime.ac.cn (G.W.); wangqi@ime.ac.cn (Q.W.); liuziyi@ime.ac.cn (Z.L.); lushunshun@ime.ac.cn (S.L.); xielu@ime.ac.cn (L.X.); huangweixing@ime.ac.cn (W.H.); liuyongbo@ime.ac.cn (Y.L.); lichen2017@ime.ac.cn (C.L.); lijunjie@ime.ac.cn (J.L.); linhongxiao@ime.ac.cn (H.L.); sujiale@ime.ac.cn (J.S.)
- <sup>2</sup> University of Chinese Academy of Sciences, Beijing 100049, China
- <sup>3</sup> Research and Development Center of Optoelectronic Hybrid IC, Guangdong Greater Bay Area Institute of Integrated Circuit and System, Guangdong 510535, China
- <sup>4</sup> Institute of Microelectronics, Chinese Academy of Sciences, Beijing 100029, China; chbzeng@ime.ac.cn
- \* Correspondence: zhuhuilong@ime.ac.cn (H.Z.); rad@ime.ac.cn (H.H.R.)

## 1. *intrinsic Si selectivity with H<sub>2</sub>O<sub>2</sub> or HNO<sub>3</sub> q-ALE*

Figure S1a and S1b show the SEM cross-section images of Sample II with the i-Si/i-SiGe/p<sup>+</sup>-Si laminated structure after etching with 30% H<sub>2</sub>O<sub>2</sub> q-ALE and 31.5% HNO<sub>3</sub> q-ALE 50 cycles, respectively. The relative etch amount (REA) of SiGe/p<sup>+</sup>-Si with H<sub>2</sub>O<sub>2</sub> and with HNO<sub>3</sub> is 24.8 nm (see Figure S1a) and 30.4 nm (see Figure S1b) respectively. The REPC with H<sub>2</sub>O<sub>2</sub> is identical to the previous data. The REPC with HNO<sub>3</sub> is ~0.6 nm, higher than the previous value due to the increase of nitric acid concentration. It is shown in Figure S1a that the REA values of SiGe/i-Si with H<sub>2</sub>O<sub>2</sub> and HNO<sub>3</sub> are identical, ~14 nm, smaller than that of SiGe/p<sup>+</sup>-Si, indicating poor selectivity to i-Si. This might be due to high reactivity of i-Si. It is illustrated that the selectivity of the digital etch SiGe to Si could be enhanced by doped Si.

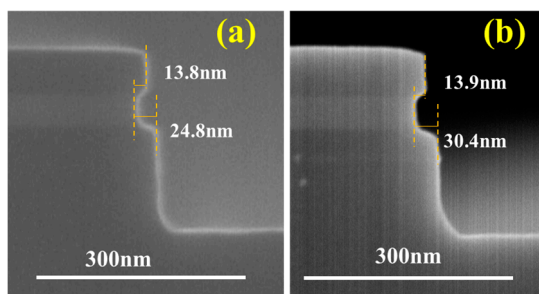

**Figure S1.** The SEM cross-section images of Sample II after digital etching at 50 cycles: (a) in 30% H<sub>2</sub>O<sub>2</sub>-dBOE q-ALE (b) 31.5% HNO<sub>3</sub>-dBOE q-ALE.

## 2. *Dependence etch surface on HNO<sub>3</sub> concentration*

Figure S2 shows the SEM cross-section images of Sample I with the  $n^+$ -Si/i-SiGe/ $p^+$ -Si laminated structure after  $\text{HNO}_3$  q-ALE etching 50 cycles with varying  $\text{HNO}_3$  concentrations. As shown, the relative etch amount (REA) of SiGe/ $n^+$ -Si increases first and then decreases with the increase of  $\text{HNO}_3$  concentration. It is demonstrated that the selectivity of  $n^+$ -Si is dependent on  $\text{HNO}_3$  concentration.

It is shown in Figure S2a that the etched surface of SiGe is very rough at 25.5%  $\text{HNO}_3$  concentration, indicating difficulty in etch reactivity. And, at 52%  $\text{HNO}_3$  concentration, the rough surface might be due to etch damage. The significant etch damage could be observed in Figure S2d.

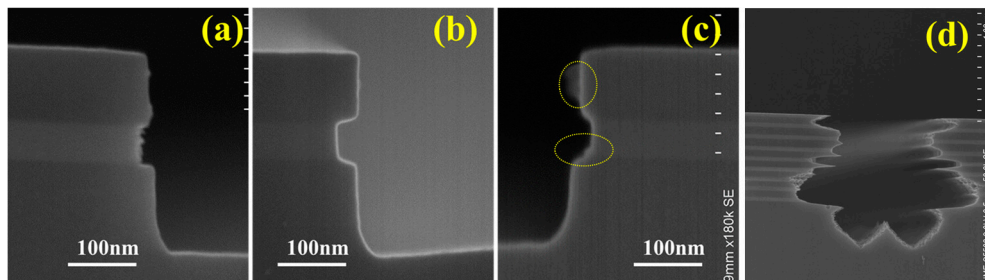

**Figure S2.** The SEM cross-section images of Sample I after  $\text{HNO}_3$  digital etching at 50 cycles with varying  $\text{HNO}_3$  concentrations: (a) 25.5%  $\text{HNO}_3$  concentration (b) 36.5%  $\text{HNO}_3$  concentration (c) 52%  $\text{HNO}_3$  concentration, the etch damage is marked in the yellow dotted line. (d) significant etch damage at 52%  $\text{HNO}_3$  concentration.
